# Supplementary material for: The Prognostic Value of Anemia in Patients with Preserved, Mildly Reduced and Recovered Ejection Fraction
Source: MDPI journal article supplement (doi:10.3390/diagnostics12020517), 2022-02-17
Supplement: s1 [file s1]

Supplementary Figures

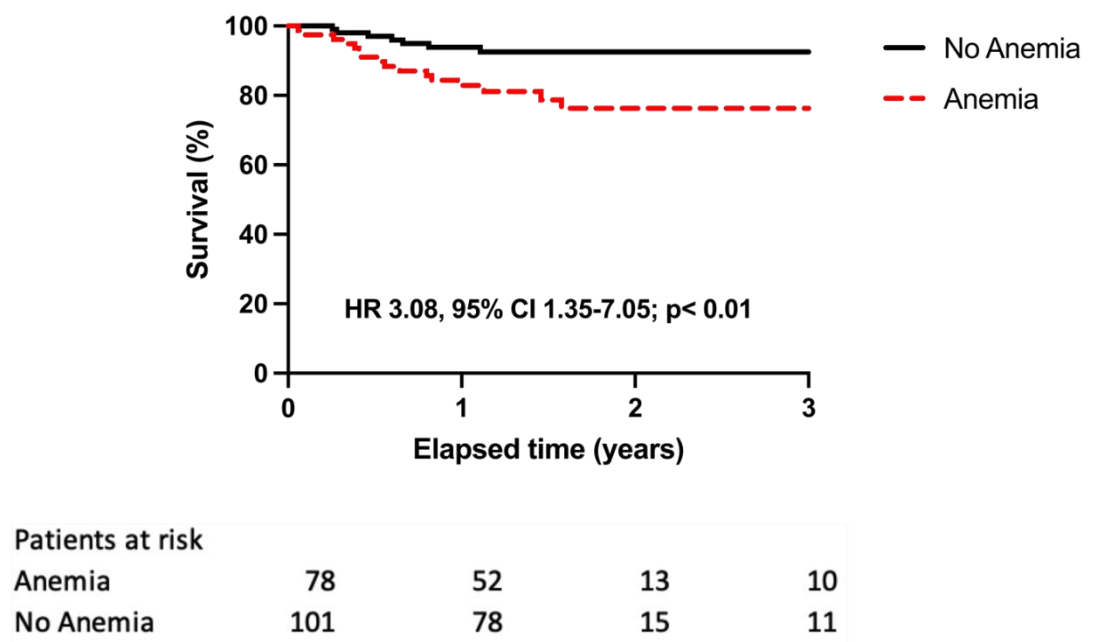

a

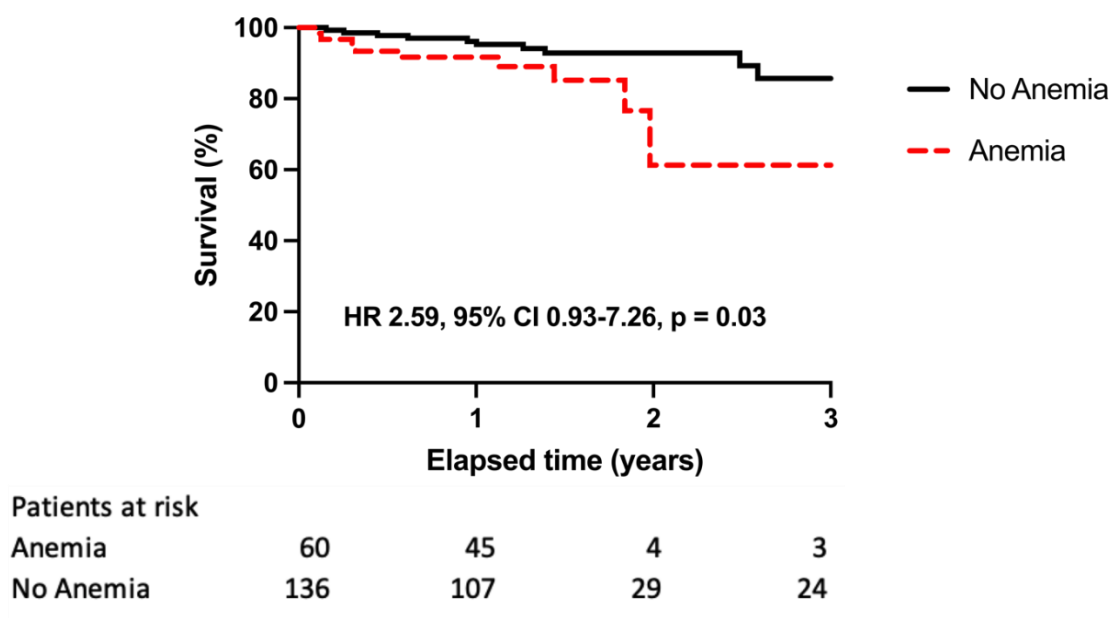

b

**Figure S1. a.** Kaplan-Meier Estimates of the Probability of Survival according to presence vs. absence of anemia in males; **b.** Kaplan-Meier Estimates of the Probability of Survival according to presence vs. absence of anemia in females.

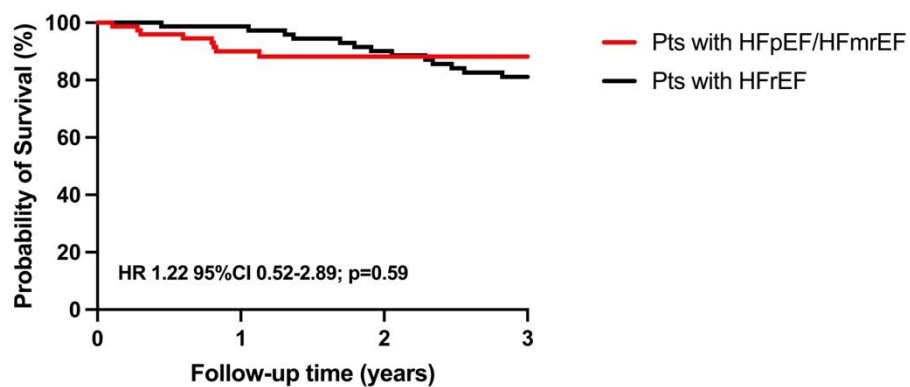

Patients at risk

Pts with HFpEF/HFmrEF

75

54

9

8

Pts with HFrEF

75

74

61

48

**Figure S2.** Kaplan-Meier Estimates of the Probability of Survival in the total HFpEF-HFmrEF and HFrEF groups.
